1 **Nuclear genome of a pedinophyte pinpoints genomic innovation and streamlining in**  
2 **the green algae**

3 **Authors**

4 Sonja I Repetti<sup>1</sup>, Cintia Iha<sup>1</sup>, Kavitha Uthannumallian<sup>1</sup>, Christopher J Jackson<sup>1</sup>, Yibi Chen<sup>2</sup>,  
5 Cheong Xin Chan<sup>2</sup>, Heroen Verbruggen<sup>1</sup>

6 **Addresses**

7 <sup>1</sup>School of BioSciences, University of Melbourne, Victoria 3010, Australia

8 <sup>2</sup>The University of Queensland, School of Chemistry and Molecular Biosciences,  
9 Australian Centre for Ecogenomics, Brisbane, Queensland 4072, Australia

10 **Author for correspondence:** Sonja I Repetti [sonjarepetti@live.com.au](mailto:sonjarepetti@live.com.au)

11

12 **Abstract**

13 The genomic diversity underpinning high ecological and species diversity in the green  
14 algae (Chlorophyta) remains little known. Here, we aimed to track genome evolution in  
15 the Chlorophyta, focusing on loss and gain of homologous genes, and lineage-specific  
16 innovations of the Core Chlorophyta. We generated a high-quality nuclear genome for  
17 pedinophyte YPF701, a sister lineage to others in the Core Chlorophyta, and  
18 incorporated this genome in a comparative analysis with 25 other genomes from  
19 diverse Viridiplantae taxa. The nuclear genome of pedinophyte YPF701 has an  
20 intermediate size and gene number between those of most early-diverging  
21 prasinophytes and the remainder of the Core Chlorophyta. Our results suggest positive  
22 selection for genome streamlining in Pedinophyceae, independent from genome  
23 minimisation observed among prasinophyte lineages. Genome expansion was  
24 predicted along the branch leading to the UTC clade (classes Ulvophyceae,  
25 Trebouxiophyceae and Chlorophyceae) after divergence from their common ancestor  
26 with pedinophytes, with genomic novelty implicated in a range of basic biological  
27 functions. These results emphasise multiple independent signals of genome  
28 minimisation within the Chlorophyta, as well as the genomic novelty arising prior to

29 diversification in the UTC clade, which may underpin the success of this species-rich  
30 clade in a diversity of habitats.

31 **Key words:** Chlorophyta, genome evolution, green algae, nuclear genome,  
32 pedinophyte, streamlining, UTC, Viridiplantae

### 33 **Introduction**

34 The Chlorophyta are a diverse group of green algae, belonging, along with the  
35 Streptophyta and Prasinodermophyta, to the Viridiplantae, an ancient lineage that  
36 diverged from a putative ‘ancestral green flagellate’ (Leliaert *et al.*, 2012; Fang *et al.*,  
37 2017; Li *et al.*, 2020). The Chlorophyta are subdivided into the Core Chlorophyta and  
38 the paraphyletic early branching prasinophytes, which are mostly marine unicellular  
39 planktonic algae (Marin, 2012; Fučíková *et al.*, 2014; Fang *et al.*, 2017, 2018). The more  
40 species-rich Core Chlorophyta comprise the well-supported ‘UTC’ clade - which is  
41 composed of the classes Ulvophyceae, Trebouxiophyceae and Chlorophyceae - and the  
42 smaller and earlier diverging Chlorodendrophyceae and Pedinophyceae (Del Cortona  
43 *et al.*, 2020).

44 Numerous studies (e.g. Derelle *et al.*, 2006; Palenik *et al.*, 2007) have analysed both  
45 the coding and noncoding elements in the nuclear genomes of prasinophyte lineages,  
46 elucidating features correlated with early divergence and diversification of green algae  
47 (Lemieux *et al.*, 2019). The prasinophyte genus *Ostreococcus* represents some of the  
48 smallest free-living eukaryotes with relatively small (~13 Mb) genomes (Derelle *et al.*,  
49 2006; Palenik *et al.*, 2007). Compared to genomes of other chlorophytes, the reduced  
50 genomes of prasinophytes exhibit smaller numbers of gene families and genes,  
51 shortened intergenic regions, and fused genes (Derelle *et al.*, 2006; Moreau *et al.*,  
52 2012). The small and gene-dense genomes of prasinophytes may reflect genome  
53 streamlining, a hypothesis that postulates selection acts to minimize the cost of  
54 replicating non-essential DNA, thereby reducing genome size (Giovannoni, 2005).  
55 Studies have concluded that genome minimization has occurred separately in  
56 prasinophyte groups Chloropicophyceae and Mamiellophyceae, involving different  
57 predicted losses of genes and pathways (Lemieux *et al.*, 2019).

58 Most genomic studies in the Core Chlorophyta have investigated taxon-specific  
59 innovations that underpin their ecological success under a range of environmental  
60 pressures including high acidity (Hirooka *et al.*, 2017), high salinity (Foflonker *et al.*,  
61 2015), polar conditions (Blanc *et al.*, 2012; Zhang *et al.*, 2020), and as symbionts (Blanc  
62 *et al.*, 2010; Arriola *et al.*, 2018; Iha *et al.*, 2021). Members of the Core Chlorophyta,  
63 particularly the UTC clade, also show high morphological diversity (Table S1), including  
64 unicellular, siphonous, and multicellular forms, which appear to have arisen on  
65 multiple occasions in both the Chlorophyceae and Ulvophyceae (Featherston *et al.*,  
66 2017; De Clerck *et al.*, 2018; Del Cortona *et al.*, 2020). Although the number of  
67 sequenced genomes for the Core Chlorophyta is increasing steadily, the genomic  
68 diversity underpinning their ecological and species diversity remains to be  
69 systematically investigated.

70 Positioned as sister to the rest of the Core Chlorophyta (Del Cortona *et al.*, 2020), the  
71 class Pedinophyceae (pedinophytes) (Moestrup, 1991; Marin, 2012) presents an  
72 excellent study subject to examine the evolution of the Core Chlorophyta, including  
73 the gene family evolution that occurred as this group diverged. Pedinophytes are small  
74 (2.5-7.0  $\mu\text{m}$ ), usually naked, unicellular green flagellates found in water or soil habitats  
75 and sometimes in symbioses (Sweeney, 1976; Cachon & Caram, 1979; Karpov &  
76 Tanichev, 1992; Marin, 2012; Jackson *et al.*, 2018). Pedinophyte morphology varies  
77 greatly, and they have been described in a variety of environments ranging from  
78 freshwater, marine, to hyperhaline (Karpov & Tanichev, 1992; Jones *et al.*, 1994).

79 In this study, we present a high-quality nuclear genome of a pedinophyte.  
80 Incorporating this genome in a comparative analysis with 25 genomes from other  
81 Viridiplantae taxa, we investigated genome evolution in the Chlorophyta, focussing on  
82 patterns of gene-family loss and gain. We emphasise the implication of these results  
83 for innovations that may have emerged upon divergence and subsequent  
84 diversification of the Core Chlorophyta lineage.

## 85 **Materials and Methods**

### 86 **Culturing and nucleic acid extraction**

87 Pedinophyte strain YPF701 (NIES Microbial Culture Collection strain NIES-2566) was  
88 cultured in K-enriched seawater medium (Keller *et al.*, 1987) at 20 °C on a 10:14 hour  
89 light:dark cycle. To reduce bacterial load, cultures were treated with antibiotics  
90 (cefotaxime 0.72mg/mL, carbenicillin 0.72mg/mL, kanamycin 0.03mg/mL and  
91 amoxicillin 0.03mg/mL) one week prior to extraction for long-read sequencing. Total  
92 genomic DNA was extracted using a modified CTAB protocol, in which the CTAB  
93 extraction buffer was added directly to the cell pellets (Cremen *et al.*, 2016).

#### 94 **DNA and RNA Sequencing**

95 DNA was sequenced using nanopore sequencing technology (MinION, Oxford  
96 Nanopore Technologies), producing approximately 953,000 reads and 6.61 GB, with an  
97 average read length of approximately 7,000 bp.

98 DNA was prepared for short-read sequencing using a Kapa Biosystems kit, for  
99 sequencing of 2 × 150 bp paired-end reads using the Illumina NextSeq platform at  
100 Novogene, Hong Kong (see Jackson *et al.*, 2018). For RNA sequencing, total RNA was  
101 extracted using PureLink™ Plant RNA Reagent (Thermofisher, Waltham, MA, USA). A  
102 strand-specific 100 bp paired-end library was constructed and sequenced using  
103 Illumina HiSeq 2500.

#### 104 ***De novo* assembly of pedinophyte transcriptome and genome**

105 Removal of adaptors from long-read data was performed with Porechop (Wick *et al.*,  
106 2017), <https://github.com/rrwick/Porechop>). Quality filtering was performed using  
107 Filtlong (<https://github.com/rrwick/Filtlong>), with quality cutoff 50 and window quality  
108 cutoff 40.

109 Quality filtering of short reads was performed using Trimmomatic v0.39 (Bolger *et al.*,  
110 2014) with the following settings: LEADING:3 TRAILING:3 SLIDINGWINDOW:4:20.

111 Transcriptome data were assembled using Trinity v2.8.3 (Grabherr *et al.*, 2011).

112 *De novo* genome assembly was conducted using MaSuRCa v3.2.8 (Zimin *et al.*, 2013) at  
113 default setting, combining both long- and short-read data.

114 The assembled genome was filtered to remove contaminants based on a  
115 comprehensive strategy employing taxonomic annotations, read coverage,  
116 transcriptome data, and GC content. For this process, genes were predicted for the  
117 scaffolds using GeneMark-ES version 2.0 (Ter-Hovhannisyan *et al.*, 2008), and the  
118 associated coding sequences (CDS) were searched (BLASTN) against the GenBank  
119 nucleotide (nt) database and subsequently categorized as green algae, bacteria, or  
120 other, based on the top hit. We manually verified this categorisation and removed  
121 scaffolds with a high similarity to sequenced bacterial genomic data, no predicted  
122 genes, no mapped transcripts, and/or deviant average coverage of sequencing reads or  
123 GC content from the assembly. This ensured high confidence that retained scaffolds  
124 represent correctly assembled segments of the pedinophyte genome. Scaffolds  
125 corresponding to the mitochondrial and chloroplast genomes were also removed  
126 based on their CDS matching sequenced organelle genomes on GenBank. This  
127 approach revised the assembled genome from 34 Mbp (1877 scaffolds) to the final  
128 assembly of 28 Mbp (32 scaffolds).

129 Genome summary statistics were calculated with QCAST 5.0.2 (Mikheenko *et al.*, 2018)  
130 and Geneious 11.1.2 (Kearse *et al.*, 2012).

### 131 ***Ab initio* prediction of protein-coding genes**

132 After filtering of scaffolds, we followed the workflow described in Iha *et al.* (2021) to  
133 predict protein-coding genes from the assembled genome sequences. Novel repeat  
134 families were identified with RepeatModeler v1.0.11  
135 (<http://www.repeatmasker.org/RepeatModeler/>). All repeats (including known  
136 repeats in RepeatMasker database release 20181026) in the genome scaffolds were  
137 masked using RepeatMasker v4.0.7 (<http://www.repeatmasker.org/>) before gene  
138 prediction.

139 To generate high-quality evidence to guide gene prediction, we first employed PASA  
140 pipeline v2.3.3 and TransDecoder (Haas *et al.*, 2003) to predict transcript-based  
141 protein-coding genes from the unmasked genome assembly and the assembled  
142 transcriptome. Predicted proteins were searched (BLASTP,  $E \leq 10^{-20}$ , >80% query cover)  
143 against proteins in RefSeq database (release 88), and checked for transposable

144 elements using HHblits v2.0.16 (Remmert *et al.*, 2012) and TransposonPSI (Haas,  
145 2007). Predicted proteins with hits to RefSeq and no transposable elements were  
146 retained, and redundant sequences were removed using CD-HIT v4.6.8 (Li & Godzik,  
147 2006) (-c 0.75 -n 5). The resulting gene models were then used to infer high-quality  
148 “golden genes” using the script *Prepare\_golden\_genes\_for\_predictors.pl* from the  
149 JAMg pipeline (<https://github.com/genomecuration/JAMg>). These “golden genes”  
150 were used as the training set to guide gene prediction in the repeat-masked genome  
151 sequences with AUGUSTUS v3.3.1 (Stanke *et al.*, 2006) and SNAP (Korf, 2004).  
152 Additional gene models were generated with GeneMark-ES v4.38 (Lomsadze *et al.*,  
153 2005) and MAKER v2.31.10 (Holt & Yandell, 2011) (protein2genome, UniProt-SwissProt  
154 database retrieved 27 June 2018). Protein-coding genes predicted using the five  
155 methods (PASA, AUGUSTUS, SNAP, MAKER, and GeneMark-ES) were integrated using  
156 EvidenceModeler v1.1.1 (Haas *et al.*, 2008). The weights for each gene prediction  
157 output were: GeneMark-ES 2, MAKER 8, PASA 10, SNAP 2, AUGUSTUS 6. We retain  
158 PASA-predicted genes (which are supported by transcriptome evidence), and those  
159 predicted by two or more other methods, as the final set of protein-coding genes.

## 160 **Comparison of nuclear genomes for the green lineage**

161 For comparative genomic analyses, we built a dataset, containing both genomes and  
162 proteomes, of 20 Chlorophyta taxa, including pedinophyte strain YPF701, 5  
163 Streptophyta taxa, and *Prasinoderma coloniale* (Table S1). Percentage of identified  
164 BUSCO sequences was assessed for all proteomes with BUSCO v5.2.2 (Manni *et al.*,  
165 2021), using the chlorophyta\_odb10 lineage for members of the Chlorophyta,  
166 streptophyta\_odb10 lineage for members of the Streptophyta and viridiplantae\_odb10  
167 for *Prasinoderma coloniale* and *Klebsormidium nitens*.

168 GC content of CDS and synonymous codon usage order (SCUO) were calculated using  
169 the CodonO (Angellotti *et al.*, 2007) function from the cubfits v.0.1-3 (Chen *et al.*,  
170 2014) package in R version 3.5.1 (R Core Team, 2020). SCUO value ranges from 0 to 1,  
171 with a larger value indicating stronger codon usage bias.

172 We used the OrthoFinder 2.5.1 (Emms & Kelly, 2019) pipeline (default parameters) to  
173 cluster proteins from the dataset into homologous groups (i.e. “orthogroups” defined  
174 by the program).

175 A phylogenetic tree was manually constructed to reflect current knowledge of  
176 evolutionary relationships between taxa from large-scale multi-gene phylogenies (Fig.  
177 1) (Del Cortona *et al.*, 2020; Li *et al.*, 2020).

178 Based on the phylogenetic tree, the most parsimonious gain and loss scenario was  
179 reconstructed for each orthogroup using the Dollop program from PHYLIP version  
180 3.695 (Felsenstein, 2005), with the Dollo parsimony method and printing of states at  
181 all nodes of the tree. This gain and loss scenario was processed using  
182 `extract_dollop_output_sequences_v2-fast.pl` from OrthoMCL Tools v1.0 (Leonard,  
183 2015), and mapped to the tree in RStudio using R version 4.0.2 (R Core Team, 2020)  
184 with the packages `phytools` 0.7.70 (Revell, 2012), `ape` 5.4.1 (Paradis & Schliep, 2019),  
185 `maps` 3.3.0 (Brownrigg *et al.*, 2018), `ggplot2` 3.3.2 (Wickham, 2016) and `ggtree` v2.2.4  
186 (Yu *et al.*, 2017).

187 Orthogroup losses and gains were further analysed by examining their annotated Gene  
188 Ontology (GO) terms. Chlorophyta proteomes were analysed using eggNOG-mapper  
189 2.0.1 (Huerta-Cepas *et al.*, 2017, 2019), with DIAMOND 0.9.24 (Buchfink *et al.*, 2015),  
190 default settings, and ‘Viridiplantae’ as taxonomic scope to maximise accurate  
191 functional annotations. GO terms associated with sequences found in orthogroups  
192 gained or lost along branches of interest were summarised using REVIGO (Supek *et al.*,  
193 2011), focusing on the ‘Biological Process’ category. REVIGO results were visualised  
194 using CirGO (Kuznetsova *et al.*, 2019), weighted according to the number of  
195 gained/lost orthogroups associated with each GO term, including full eggNOG-mapper  
196 results for branches of interest except for orthogroups lost along YPF, for which only  
197 the top 3500 GO terms were included (when sorted by number of gained/lost  
198 orthogroups associated with each GO term) due to REVIGO constraints.

199 GO analyses using *Chlamydomonas reinhardtii*, which has more comprehensive GO  
200 annotations relative to most Chlorophyta, were also used to explore functions of  
201 orthogroups that contained *C. reinhardtii* sequences. Orthogroups gained or lost along

202 branches of interest were grouped into functional clusters according to ChlamyNET  
203 (Romero-Campero *et al.*, 2016), which provides a gene co-expression network of *C.*  
204 *reinhardtii* transcriptomes.

## 205 **Results**

206 The newly assembled nuclear genome for pedinophyte YPF701 comprises 32 scaffolds  
207 with a total length of 27,899,919 bp, scaffold N50 of 1.23 Gb, and 7,940 predicted  
208 protein-coding genes (Table S1). The genome has a size, number of proteins, and  
209 average number of genes per orthogroup that are intermediate between those of  
210 most prasinophytes and the rest of the Core Chlorophyta (Fig. 2). The GC content is  
211 70%, which is higher than most sequenced green algal nuclear genomes but not  
212 unseen in the Chlorophyta (Suzuki *et al.*, 2018). The genome shows the highest  
213 synonymous codon usage order of the Viridiplantae genomes included in this study  
214 (Fig. 2).

215 Comparative analysis of predicted proteins from 26 genomes (Table S1) reveals  
216 patterns of putative gains and losses of homologous groups (i.e. OrthoFinder-defined  
217 “orthogroups”) across the Viridiplantae phylogeny, showing predicted losses  
218 outnumbering predicted gains for most Chlorophyta branches (Fig. 1). Associated GO  
219 terms and ChlamyNET classifications for sequences suggest potential functions for a  
220 subset of the orthogroups gained or lost along the branches at the base of the  
221 Chlorophyta (Chloro), Core Chlorophyta (CC) and UTC clade (UTC) and leading to the  
222 pedinophyte genome (YPF) (Tables S2, S3), with many GO terms implicated in  
223 metabolism and biological processes related to signalling and regulation in cells (Fig.  
224 S1). The use of ‘Viridiplantae’ as taxonomic scope for eggNOG-mapper, due to how  
225 little GO data is available for the Chlorophyta, resulted in GO term annotations for  
226 plant-specific processes, including "pollen tube development" and "regulation of  
227 flower development" (Table S2), which likely incorporate these biological functions.  
228 Results from ChlamyNet analysis reinforce these functional themes of cell regulation  
229 and metabolism (Fig. 3), with the greatest number of ChlamyNet hits for most  
230 branches falling into cluster 3: "protein phosphorylation, ribosome biogenesis and  
231 macromolecular synthesis". This is the largest ChlamyNet cluster, which is involved in



232 diverse biological processes and is significantly enriched in transcription factors  
233 (Romero-Campero *et al.*, 2016).

234 Considerable loss of orthogroups is predicted for the YPF branch following divergence  
235 from the rest of the Core Chlorophyta. A similar reduction of orthogroups is predicted  
236 for branches leading to each of the major prasinophyte groups, as well as to some  
237 individual taxa within the UTC clade (e.g. *Picochlorum*, *Ulva*, *Caulerpa+Ostreobium*).  
238 Sequences in orthogroups lost along the pedinophyte branch are diverse in function  
239 (Figs 3, S1), and many appear to be implicated in cell cycling and division, gene  
240 expression, and also include some light-related GO terms: “response to high light  
241 intensity”, “photosystem I assembly” and “red or far-red light signaling pathway”  
242 (Table S2). None of the orthogroups associated with these terms appear to be  
243 essential in the Chlorophyta, and they are absent in several lineages.

244 Conversely, a considerable gain in new orthogroups is predicted to have occurred  
245 along the UTC branch leading to the rest of the Core Chlorophyta following their  
246 divergence from the pedinophytes (Fig. 1). For the UTC, predicted gained orthogroups  
247 are associated with GO terms related to regulation, metabolism, reproduction and  
248 growth (Fig. 3, Table S2). In contrast, less change is predicted for the number of  
249 orthogroups along the branch leading to the last common ancestor of the Core  
250 Chlorophyta (CC) (Fig. 1, Table S3), and GO terms associated with predicted gained and  
251 lost orthogroups are reasonably balanced in terms of hierarchical clusters, lacking a  
252 clear functional pattern (Fig. S1, Table S2).

## 253 **Discussion**

### 254 **Recurring genome minimisation in the green algae**

255 The pedinophyte nuclear genome represents a missing link to examine early evolution  
256 of the Chlorophyta. The coding regions show strong codon and GC biases, which are  
257 also observed in their compact, intron-lacking chloroplast genomes (Marin, 2012;  
258 Jackson *et al.*, 2018; Uthanumallian *et al.*, 2021), indicating that they are under  
259 comparatively strong selection. The pedinophyte lineage also appears to have  
260 experienced considerable loss of homologous gene groups. These observations  
261 collectively support the hypothesis of selection for genome streamlining in the

262 Pedinophyceae (Giovannoni, 2005). Genome streamlining appears to have occurred  
263 following the divergence of the Pedinophyceae from the rest of the Core Chlorophyta,  
264 with comparatively fewer changes in orthogroups predicted for the CC branch, and  
265 signals of genome reduction observed only for individual taxa within the UTC clade (eg.  
266 Gao *et al.*, 2014; Foflonker *et al.*, 2015). As Pedinophyceae are unicellular while many  
267 sequenced Core Chlorophyta are colonial and multicellular, the pedinophytes may  
268 have a larger effective population size, increasing the power of selection acting on  
269 their coding content to retain essential genes and remove non-essential DNA (Lynch,  
270 2006; Smith, 2016).

271 Multiple independent signals of genome minimisation are observed at the base of the  
272 Chlorophyta: in the Pedinophyceae, Chloropicophyceae and Mamiellophyceae  
273 (Lemieux *et al.*, 2019). This might indicate that the Chlorophyta common ancestor had  
274 a genome larger than those of many early-branching lineages. Evidence for larger  
275 ancestral Chlorophyta genomes remains circumstantial, but the conspicuous pattern of  
276 genome minimisation in early-branching lineages raises intriguing questions about the  
277 origin of Chlorophyta genomes. This predicted higher genomic novelty gained at  
278 deeper nodes followed by independent reduction events resembles patterns seen in  
279 recent comparisons of metazoan (Paps & Holland, 2018; Fernández & Gabaldón, 2020)  
280 and streptophyte (Bowles *et al.*, 2020) genomes, and is consistent with the proposed  
281 universal biphasic model of speciation and genome evolution in eukaryotes, which  
282 involves initial rapid genome expansion (associated with emergence of new organism  
283 groups) followed by a prolonged period of gene loss driven largely by neutral  
284 processes and/or adaptive genome streamlining (Cuypers & Hogewe, 2012; Wolf &  
285 Koonin, 2013; Deutekom *et al.*, 2019). The pedinophyte genome shows distinct  
286 features, high GC and stronger codon usage bias, which suggest coding content is  
287 under a different level of selection intensity compared with other reduced genomes  
288 found in the prasinophytes. It may be that prasinophyte lineages experienced lower  
289 relative selection intensity, thus different balances of natural selection and drift,  
290 during genome minimisation relative to the pedinophytes. Alternatively, prasinophyte  
291 lineages might have experienced a relaxation in selection following a period of  
292 streamlining; higher SCUO values for *Micromonas* relative to the rest of the

293 Mamiellophyceae could be explained by lower relaxation of selection in this group,  
294 following the predicted genome minimisation in the Mamiellophyceae common  
295 ancestor (Worden *et al.*, 2009). Differences between the genomes of early-diverging  
296 Chlorophyta lineages point to different balances of evolutionary forces driving their  
297 independent reduction events.

#### 298 **Genomic innovation at the base of the UTC clade**

299 Comparatively more orthogroup gains are predicted for UTC, following divergence of  
300 the pedinophytes, relative to the base of the Core Chlorophyta, suggesting a  
301 considerably high amount of genomic innovation arose along this branch. The highest  
302 average number of genes per homologous group for the Chlorophyta in our study were  
303 found in the UTC: for *C. lentillifera*, and fellow Ulvophyceae *Ostreobium quekettii* and  
304 *Ulva mutabilis* (Fig. 2), and members of the volvocine algae, whose relatively high gene  
305 duplication rates have been noted elsewhere (Hanschen *et al.*, 2016). This reiterates  
306 the importance of gene duplication as a source of innovation in eukaryotic genomes  
307 (Wolf & Koonin, 2013). Bursts of conserved genomic novelty are attributed to whole-  
308 genome duplications (WGDs) in land plants (Bowles *et al.*, 2020). However, studies  
309 investigating this phenomenon across the Viridiplantae have not identified evidence  
310 for WGDs in the ancestral branches of the UTC (One Thousand Plant Transcriptomes  
311 Initiative, 2019; Bowles *et al.*, 2020).

312 Despite putative innovation in their common ancestor, considerable orthogroup loss is  
313 nonetheless predicted for many branches leading to individual taxa within the UTC  
314 clade. Although the nature of the Dollo parsimony method and false absences due to  
315 incomplete annotations might contribute to excessive losses being inferred (Wolf &  
316 Koonin, 2013; Deutekom *et al.*, 2019), our results are consistent with the biphasic  
317 model of lineage genome evolution discussed above (Cuypers & Hogewe, 2012; Wolf &  
318 Koonin, 2013). The observed pattern of genome expansion in the common ancestor of  
319 the UTC followed by extensive gene loss within individual lineages may underpin the  
320 success of this species-rich clade in a diversity of habitats (Leliaert *et al.*, 2012).

321 Genomic innovation has the potential to open up many new niches for exploration by  
322 evolving organisms, while genome reduction is proposed to drive specialisation (Wolf  
323 & Koonin, 2013). Thus, new genes gained in their common ancestor may have

324 provided genetic potential, which was then modified by lineage-specific patterns of  
325 evolution to enable the diversification of the UTC into many unique taxa inhabiting a  
326 diverse range of environments.

327 Our results from analysis of annotated gene functions reveal genomic novelty arising  
328 at the base of the Chlorophyta and UTC is implicated in a range of basic biological  
329 functions, from which specialised processes may have evolved. It appears that the  
330 genetic blueprint for many modern functions was already present in the Viridiplantae  
331 common ancestor. Probing these functional questions further is challenging, however,  
332 as the evolutionary emergence of many orthogroups predates the origin of the land  
333 plant-specific function based on their annotated GO terms (Leliaert *et al.* 2012;  
334 Romero-Campero *et al.*, 2016; Bowles *et al.*, 2020). A majority of orthogroups gained  
335 and lost along branches of evolutionary interest were not assigned GO terms (Table  
336 S3), meaning that the hypotheses proposed here represent merely the tip of the  
337 iceberg when it comes to study into the evolution of the functional gene repertoire of  
338 Chlorophyta.

339 Relative to work in the land plants and animals, comparative study into the evolution  
340 of Chlorophyta genomes is very much just beginning. This study represents merely an  
341 introductory peek into the diversification of green algae. Future study into Chlorophyta  
342 genome evolution would benefit from integration of genome annotations with  
343 functional work in order for inferences to be drawn about thus far uncharacterised  
344 genes. It is hoped that through initiatives striving for greater sampling within diverse  
345 Chlorophyta groups (e.g. Cheng *et al.*, 2018), and parallel efforts to verify gene  
346 functions, the story of genome evolution in this lineage will continue to develop in the  
347 coming years.

#### 348 **Acknowledgements**

349 Joana Costa helped with DNA extraction for Nanopore sequencing. Nanopore  
350 sequencing was performed by Louise Judd. Ryan Wick generously aided with quality  
351 filtering of Nanopore reads and perspectives for their initial assembly. This work  
352 benefited from helpful comments by Geoffrey McFadden and Patrick Buerger on

353 preliminary results included in S.I.R's honours thesis. Funding for this work was  
354 provided by the Australian Research Council (DP150100705 to HV and CXC).

### 355 **Author Contribution**

356 HV, CXC, CJJ and SIR designed the research; SIR, CI, CJJ, KU and YC performed the  
357 research; SIR, CI, KU and HV performed data analysis and interpretation; SIR, CI, KU,  
358 CJJ, YC, CXC and HV wrote the manuscript.

### 359 **Data Availability**

360 The genome sequence of Pedinophyte YPF701 is available at the European Nucleotide  
361 Archive (ENA) with the project accession number ENA: PRJEB47395 and sample  
362 number ENA: ERS7299077. The raw Illumina reads are available with the accession  
363 numbers ENA: ERR6667563-ERR6667566, and the raw Nanopore reads are available  
364 with the accession number ENA: ERR6667567. Transcriptome reads are available with  
365 the accession number ENA: ERR6667568. The assembled genome is available with the  
366 accession number ENA: ERZ3455784.

### 367 **References**

368 **Angellotti MC, Bhuiyan SB, Chen G, Wan XF. 2007.** CodonO: codon usage bias analysis within  
369 and across genomes. *Nucleic acids research* **35**: W132-W136.

370 **Arriola MB, Velmurugan N, Zhang Y, Plunkett MH, Hondzo H, Barney BM. 2018.** Genome  
371 sequences of *Chlorella sorokiniana* UTEX 1602 and *Micractinium conductrix* SAG  
372 241.80: Implications to maltose excretion by a green alga. *The Plant Journal* **93**:566–  
373 586.

374 **Blanc G, Agarkova I, Grimwood J, Kuo A, Brueggeman A, Dunigan DD, Gurnon J, Ladunga I,**  
375 **Lindquist E, Lucas S et al. 2012.** The genome of the polar eukaryotic microalga  
376 *Coccomyxa subellipsoidea* reveals traits of cold adaptation. *Genome biology* **13**:1-12.

377 **Blanc G, Duncan G, Agarkova I, Borodovsky M, Gurnon J, Kuo A, Lindquist E, Lucas S,**  
378 **Pangilinan J, Polle J et al. 2010.** The *Chlorella variabilis* nc64a genome reveals

- 379 adaptation to photosymbiosis, coevolution with viruses, and cryptic sex. *The Plant Cell*
- 380 **22**: 2943–2955.
- 381 **Bolger AM, Lohse M, Usadel B. 2014.** Trimmomatic: A flexible trimmer for Illumina sequence
- 382 data. *Bioinformatics* **30**: 2114–2120.
- 383 **Bowles AMC, Bechtold U, Paps J. 2020.** The origin of land plants is rooted in two bursts of
- 384 genomic novelty. *Current Biology* **30**: 530–536
- 385 **Brownrigg R, Minka T, Deckmyn A. 2018.** Maps: Draw Geographical Maps. R package version
- 386 3.3.0. See <https://CRAN.R-project.org/package=Maps>.
- 387 **Buchfink B, Xie C, Huson DH. 2015.** Fast and sensitive protein alignment using DIAMOND.
- 388 *Nature Methods* **12**: 59–60.
- 389 **Cachon M, Caram B. 1979.** A symbiotic green alga, *Pedinomonas symbiotica* sp. Nov.
- 390 (Prasinophyceae), in the radiolarian *Thalassolampe margarodes*. *Phycologia* **18**: 177–
- 391 184.
- 392 **Chen WC, Zaretzki R, Howell W, Landerer C, Schmidt D, Gilchrist MA. 2014** cubfits: Codon
- 393 Usage Bias Fits. *R Package* <http://cran.r-project.org/package=cubfits>
- 394 **Cheng S, Melkonian M, Smith SA, Brockington S, Archibald JM, Delaux PM, Li FW, Melkonian**
- 395 **B, Mavrodiev EV, Sun W et al. 2018.** 10KP: A phylodiverse genome sequencing plan.
- 396 *GigaScience* **7**. doi: <https://doi.org/10.1093/gigascience/giy013>
- 397 **Cremen MCM, Huisman JM, Marcelino VR, Verbruggen H. 2016.** Taxonomic revision of
- 398 *Halimeda* (Bryopsidales, Chlorophyta) in south-western Australia. *Australian*
- 399 *Systematic Botany* **29**: 41–54.
- 400 **Cuyppers TD, Hogeweg P. 2012.** Virtual genomes in flux: an interplay of neutrality and
- 401 adaptability explains genome expansion and streamlining. *Genome Biology and*
- 402 *Evolution*, **4**: 212–229.

- 403 **De Clerck O, Kao SM, Bogaert KA, Blomme J, Foflonker F, Kwantes M, Vancaester E,**  
404 **Vanderstraeten L, Aydogdu E, Boesger J et al. 2018.** Insights into the evolution of  
405 multicellularity from the sea lettuce genome. *Current Biology* **28**: 2921–2933.
- 406 **Del Cortona A, Jackson CJ, Bucchini F, Van Bel M, D’hondt S, Škaloud P, Delwiche CF, Knoll**  
407 **AH, Raven JA, Verbruggen H et al. 2020.** Neoproterozoic origin and multiple  
408 transitions to macroscopic growth in green seaweeds. *Proceedings of the National*  
409 *Academy of Sciences* **117**: 2551–2559.
- 410 **Derelle E, Ferraz C, Rombauts S, Rouze P, Worden AZ, Robbens S, Partensky F, Degroeve S,**  
411 **Echeynie S, Cooke R et al. 2006.** Genome analysis of the smallest free-living eukaryote  
412 *Ostreococcus tauri* unveils many unique features. *Proceedings of the National*  
413 *Academy of Sciences* **103**: 11647–11652.
- 414 **Deutekom ES, Vosseberg J, van Dam TJ, Snel B. 2019.** Measuring the impact of gene  
415 prediction on gene loss estimates in Eukaryotes by quantifying falsely inferred  
416 absences. *PLoS computational biology* **15**: e1007301.
- 417 **Emms DM, Kelly S. 2019.** OrthoFinder: Phylogenetic orthology inference for comparative  
418 genomics. *Genome Biology* **20**: 1–14.
- 419 **Fang L, Leliaert F, Novis PM, Zhang Z, Zhu H, Liu G, Penny D, Zhong B. 2018.** Improving  
420 phylogenetic inference of core Chlorophyta using chloroplast sequences with strong  
421 phylogenetic signals and heterogeneous models. *Molecular Phylogenetics and*  
422 *Evolution* **127**: 248–255.
- 423 **Fang L, Leliaert F, Zhang ZH, Penny D, Zhong BJ. 2017.** Evolution of the Chlorophyta: Insights  
424 from chloroplast phylogenomic analyses: Chloroplast phylogenomics of the  
425 Chlorophyta. *Journal of Systematics and Evolution* **55**: 322–332.
- 426 **Featherston J, Arakaki Y, Hanschen ER, Ferris PJ, Michod RE, Olson BJ, Nozaki H, Durand PM.**  
427 **2018.** The 4-celled *Tetrabaena socialis* nuclear genome reveals the essential

- 428 components for genetic control of cell number at the origin of multicellularity in the  
429 volvocine lineage. *Molecular Biology and Evolution* **35**: 855–870.
- 430 **Felsenstein J. (2005)**. PHYLIP (Phylogeny Inference Package) version 3.6. *Distributed by the*  
431 *author*. Department of Genome Sciences, University of Washington.
- 432 **Fernández R, Gabaldón T. 2020**. Gene gain and loss across the metazoan tree of life. *Nature*  
433 *ecology & evolution* **4**: 524–533.
- 434 **Foflonker F, Price DC, Qiu H, Palenik B, Wang S, Bhattacharya D. 2015**. Genome of the  
435 halotolerant green alga *Picochlorum* sp. reveals strategies for thriving under  
436 fluctuating environmental conditions: Genome analysis of *Picochlorum* SE3.  
437 *Environmental Microbiology* **17**: 412–426.
- 438 **Fučíková K, Leliaert F, Cooper ED, Ákaloud P, D’Hondt S, De Clerck O, Gurgel CFD, Lewis LA,**  
439 **Lewis PO, Lopez-Bautista JM et al. 2014**. New phylogenetic hypotheses for the core  
440 Chlorophyta based on chloroplast sequence data. *Frontiers in Ecology and Evolution*, **2**.  
441 doi: <https://doi.org/10.3389/fevo.2014.00063>
- 442 **Gao C, Wang Y, Shen Y, Yan D, He X, Dai J, Wu Q. 2014**. Oil accumulation mechanisms of the  
443 oleaginous microalga *Chlorella protothecoides* revealed through its genome,  
444 transcriptomes, and proteomes. *BMC genomics* **15**: 1–14.
- 445 **Giovannoni SJ. 2005**. Genome Streamlining in a Cosmopolitan Oceanic Bacterium. *Science* **309**:  
446 1242–1245.
- 447 **Grabherr MG, Haas BJ, Yassour M, Levin JZ, Thompson DA, Amit I, Adiconis X, Fan L,**  
448 **Raychowdhury R, Zeng Q. 2011**. Trinity: Reconstructing a full-length transcriptome  
449 without a genome from RNA-Seq data. *Nature Biotechnology* **29**: 644.
- 450 **Hanschen ER, Marriage TN, Ferris PJ, Hamaji T, Toyoda A, Fujiyama A, Neme R, Noguchi H,**  
451 **Minakuchi Y, Suzuki M et al. 2016**. The *Gonium pectorale* genome demonstrates co-  
452 option of cell cycle regulation during the evolution of multicellularity. *Nature*  
453 *Communications* **7**: 11370.



- 454 **Haas B. 2007.** TransposonPSI: an application of PSI-Blast to mine (retro-) transposon ORF  
455 homologues. *Broad Institute, Cambridge, MA, USA.*
- 456 **Haas BJ, Delcher AL, Mount SM, Wortman JR, Smith RK Jr, Hannick LI, Maiti R, Ronning CM,**  
457 **Rusch DB, Town CD et al. 2003.** Improving the *Arabidopsis* genome annotation using  
458 maximal transcript alignment assemblies. *Nucleic Acids Research* **31**: 5654-5666.
- 459 **Haas BJ, Salzberg SL, Zhu W, Pertea M, Allen JE, Orvis J, White O, Buell CR, Wortman JR.**  
460 **(2008).** Automated eukaryotic gene structure annotation using EVIDENCEModeler and  
461 the Program to Assemble Spliced Alignments. *Genome Biology* **9**: R7.
- 462 **Hirooka S, Hirose Y, Kanesaki Y, Higuchi S, Fujiwara T, Onuma R, Era A, Ohbayashi R, Uzuka A,**  
463 **Nozaki H. 2017.** Acidophilic green algal genome provides insights into adaptation to an  
464 acidic environment. *Proceedings of the National Academy of Sciences* **114**: E8304–  
465 E8313.
- 466 **Holt C, Yandell M. 2011.** MAKER2: an annotation pipeline and genome-database management  
467 tool for second-generation genome projects. *BMC Bioinformatics* **12**: 491.
- 468 **Huerta-Cepas J, Forslund K, Coelho LP, Szklarczyk D, Jensen LJ, Von Mering C, Bork P. 2017.**  
469 Fast genome-wide functional annotation through orthology assignment by eggNOG-  
470 mapper. *Molecular Biology and Evolution* **34**: 2115–2122.
- 471 **Huerta-Cepas J, Szklarczyk D, Heller D, Hernández-Plaza A, Forslund SK, Cook H, Mende DR,**  
472 **Letunic I, Rattei T, Jensen LJ. 2019.** eggNOG 5.0: A hierarchical, functionally and  
473 phylogenetically annotated orthology resource based on 5090 organisms and 2502  
474 viruses. *Nucleic Acids Research* **47**: D309–D314.
- 475 **Iha C, Dougan KE, Varela JA, Avila V, Jackson CJ, Bogaert KA, Chen Y, Judd LM, Wick R, Holt**  
476 **KE et al. 2021.** Genomic adaptations to an endolithic lifestyle in the coral-associated  
477 alga *Ostreobium*. *Current Biology* **31**: 1393–1402.

- 478 **Jackson C, Knoll AH, Chan CX, Verbruggen H. 2018.** Plastid phylogenomics with broad taxon  
479 sampling further elucidates the distinct evolutionary origins and timing of secondary  
480 green plastids. *Scientific Reports* **8**: 1523.
- 481 **Jones HLJ, Leadbeater BSC, Green JC. 1994.** An ultrastructural study of *Marsupiomonas*  
482 *pelliculata* gen. Et sp. Nov., a new member of the Pedinophyceae. *European Journal of*  
483 *Phycology* **29**: 171–181.
- 484 **Karpov SA, Tanichev AI. 1992.** The ultrastructural study of green alga *Pedinomonas tenuis*  
485 Masiuk, 1970 with special reference to the flagellar apparatus. *Archiv Für*  
486 *Protistenkunde* **141**: 315–326.
- 487 **Kearse M, Moir R, Wilson A, Stones-Havas S, Cheung M, Sturrock S, Buxton S, Cooper A,**  
488 **Markowitz S, Duran C. 2012.** Geneious Basic: An integrated and extendable desktop  
489 software platform for the organization and analysis of sequence data. *Bioinformatics*  
490 **28**: 1647–1649.
- 491 **Keller MD, Selvin RC, Claus W, Guillard RR. 1987.** Media for the culture of oceanic  
492 ultraphytoplankton. *Journal of Phycology* **23**: 633–638.
- 493 **Korf I. 2004.** Gene finding in novel genomes. *BMC Bioinformatics* **5**: 59.
- 494 **Kuznetsova I, Lugmayr A, Siira SJ, Rackham O, Filipovska A. 2019.** CirGO: an alternative  
495 circular way of visualising gene ontology terms. *BMC bioinformatics* **20**: 1–7.
- 496 **Leliaert F, Smith DR, Moreau H, Herron MD, Verbruggen H, Delwiche CF, De Clerck O. 2012.**  
497 Phylogeny and Molecular Evolution of the Green Algae. *Critical Reviews in Plant*  
498 *Sciences* **31**: 1–46.
- 499 **Lemieux C, Turmel M, Otis C, Pombert JF. (2019).** A streamlined and predominantly diploid  
500 genome in the tiny marine green alga *Chloropicon primus*. *Nature Communications* **10**:  
501 4061.
- 502 **Leonard G. 2015.** *orthomcl\_tools: OrthoMCL Tools v1.0.*  
503 [https://github.com/guyleonard/orthomcl\\_tools](https://github.com/guyleonard/orthomcl_tools)

- 504 **Li W, Godzik A. 2006.** Cd-hit: a fast program for clustering and comparing large sets of protein  
505 or nucleotide sequences. *Bioinformatics* **22**: 1658–1659.
- 506 **Li L, Wang S, Wang H, Sahu SK, Marin B, Li H, Xu Y, Liang H, Li Z,**  
507 **Cheng S et al. 2020.** The genome of *Prasinoderma coloniale*  
508 unveils the existence of a third phylum within green plants.  
509 *Nature ecology & evolution* **4**: 1220–1231.
- 510 **Lomsadze A, Ter-Hovhannisyan V, Chernoff YO, Borodovsky**  
511 **M. 2005.** Gene identification in novel eukaryotic genomes by self-training algorithm.  
512 *Nucleic Acids Research* **33**: 6494–6506.
- 513 **Lynch M. 2006.** The origins of eukaryotic gene structure. *Molecular Biology and Evolution* **23**:  
514 450–468.
- 515 **Manni M, Berkeley MR, Seppey M, Simao FA, Zdobnov EM. 2021.** BUSCO update: novel and  
516 streamlined workflows along with broader and deeper phylogenetic coverage for  
517 scoring of eukaryotic, prokaryotic, and viral genomes. *arXiv preprint arXiv:2106.11799*.
- 518 **Marin B. 2012.** Nested in the Chlorellales or Independent Class? Phylogeny and Classification  
519 of the Pedinophyceae (Viridiplantae) Revealed by Molecular Phylogenetic Analyses of  
520 Complete Nuclear and Plastid-encoded rRNA Operons. *Protist* **163**: 778–805.
- 521 **Mikheenko A, Prjibelski A, Saveliev V, Antipov D, Gurevich A. 2018.** Versatile genome  
522 assembly evaluation with QUAST-LG. *Bioinformatics* **34**: i142–i150.
- 523 **Moestrup Ø. 1991.** Further studies of presumed primitive green algae, including the  
524 description of pedinophyceae class. Nov. And resultor gen. Nov. 1. *Journal of*  
525 *Phycology* **27**: 119–133.
- 526 **Moreau H, Verhelst B, Couloux A, Derelle E, Rombauts S, Grimsley N, Van Bel M, Poulain J,**  
527 **Katinka M, Hohmann-Marriott M et al. 2012.** Gene functionalities and genome  
528 structure in *Bathycoccus prasinus* reflect cellular specializations at the base of the  
529 green lineage. *Genome Biology* **13**: R74.

- 530 **One Thousand Plant Transcriptomes Initiative. 2019.** One thousand plant transcriptomes and  
531 the phylogenomics of green plants. *Nature* **574**: 679–685.
- 532 **Palenik B, Grimwood J, Aerts A, Rouzé P, Salamov A, Putnam N, Dupont C, Jorgensen R,**  
533 **Derelle E, Rombauts S et al. 2007.** The tiny eukaryote *Ostreococcus* provides genomic  
534 insights into the paradox of plankton speciation. *Proceedings of the National Academy*  
535 *of Sciences* **104**: 7705–7710.
- 536 **Paps J, Holland PW. 2018.** Reconstruction of the ancestral metazoan genome reveals an  
537 increase in genomic novelty. *Nature communications* **9**: 1-8.
- 538 **Paradis E, Schliep K. 2019.** ape 5.0: An environment for modern phylogenetics and  
539 evolutionary analyses in R. *Bioinformatics* **35**: 526–528.
- 540 **R Core Team. 2020.** *R: A language and environment for statistical computing*. [https://www.R-](https://www.R-project.org/)  
541 [project.org/](https://www.R-project.org/)
- 542 **Remmert M, Biegert A, Hauser A, Söding J. 2012.** HHblits: lightning-fast iterative protein  
543 sequence searching by HMM-HMM alignment. *Nature Methods* **9**: 173–175.
- 544 **Revell LJ. 2012.** phytools: An R package for phylogenetic comparative biology (and other  
545 things). *Methods in Ecology and Evolution* **3**: 217–223.
- 546 **Romero-Campero FJ, Perez-Hurtado I, Lucas-Reina E, Romero JM, Valverde F. 2016.**  
547 ChlamyNET: A *Chlamydomonas* gene co-expression network reveals global properties  
548 of the transcriptome and the early setup of key co-expression patterns in the green  
549 lineage. *BMC Genomics* **17**: 227.
- 550 **Smith DR. 2016.** The mutational hazard hypothesis of organelle genome evolution: 10 years  
551 on. *Molecular Ecology* **25**: 3769–3775.
- 552 **Stanke M, Keller O, Gunduz I, Hayes A, Waack S, Morgenstern B. 2006.** AUGUSTUS: ab initio  
553 prediction of alternative transcripts. *Nucleic Acids Research* **34**: W435–W439.
- 554 **Supek F, Bošnjak M, Škunca N, Šmuc T. 2011.** REVIGO summarizes and visualizes long lists of  
555 gene ontology terms. *PloS one* **6**: e21800.

- 556 **Suzuki S, Yamaguchi H, Nakajima N, Kawachi M. 2018.** *Raphidocelis subcapitata*  
557 (=Pseudokirchneriella subcapitata) provides an insight into genome evolution and  
558 environmental adaptations in the Sphaeropleales. *Scientific Reports* **8**: 8058.
- 559 **Sweeney BM. 1976.** *Pedinomonas Noctilucae* (Prasinophyceae), the flagellate symbiotic in  
560 *Noctiluca* (dinophyceae) in southeast Asia 1. *Journal of Phycology* **12**: 460–464.
- 561 **Ter-Hovhannisyan V, Lomsadze A, Chernoff YO, Borodovsky M. 2008.** Gene prediction in  
562 novel fungal genomes using an ab initio algorithm with unsupervised training. *Genome*  
563 *Research* **18**: 1979–1990.
- 564 **Uthanumallian K, Iha C, Repetti SI, Chan CX, Bhattacharya D, Duchene S, Verbruggen H. 2021.**  
565 Tightly constrained genome reduction and relaxation of purifying selection during  
566 secondary plastid endosymbiosis. *BioRxiv*. doi:  
567 <https://doi.org/10.1101/2021.05.27.446077>
- 568 **Wick RR, Judd LM, Gorrie CL, Holt KE. 2017.** Completing bacterial genome assemblies with  
569 multiplex MinION sequencing. *Microbial Genomics* **3**. doi:  
570 <https://doi.org/10.1099/mgen.0.000132>
- 571 **Wickham H. 2016.** *ggplot2: Elegant graphics for data analysis*. Springer-Verlag.  
572 <https://ggplot2.tidyverse.org>
- 573 **Wolf YI, Koonin EV, 2013.** Genome reduction as the dominant mode of evolution. *Bioessays*  
574 **35**: 829-837.
- 575 **Worden AZ, Lee JH, Mock T, Rouzé P, Simmons MP, Aerts AL, Allen AE, Cuvelier ML, Derelle**  
576 **E, Everett MV et al. 2009.** Green evolution and dynamic adaptations revealed by  
577 genomes of the marine picoeukaryotes *Micromonas*. *Science* **324**: 268–272.
- 578 **Yu G, Smith DK, Zhu H, Guan Y, Lam TT. 2017.** ggtree: An R package for visualization and  
579 annotation of phylogenetic trees with their covariates and other associated data.  
580 *Methods in Ecology and Evolution* **8**: 28–36.

581 **Zhang Z, Qu C, Zhang K, He Y, Zhao X, Yang L, Zheng Z, Ma X, Wang X, Wang W et al. 2020.**

582           Adaptation to extreme Antarctic environments revealed by the genome of a sea ice

583           green alga. *Current Biology* **30**: 3330–3341.

584 **Zimin AV, Marçais G, Puiu D, Roberts M, Salzberg SL, Yorke JA. 2013.** The MaSuRCA genome

585           assembler. *Bioinformatics* **29**: 2669–2677.

586

## 587 **Supplementary Legends**

588 **Fig. S1** CirGO visualisations of REVIGO results for GO terms associated with sequences

589 in predicted gained orthogroups along branches Chloro, CC, UTC and YPF, and

590 predicted lost orthogroups along branches CC, UTC and YPF, weighted according to the

591 number of gained/lost orthogroups associated with each GO term.

592 **Table S1** Comparison of Viridiplantae nuclear genomes used for analysis in this study

593 **Table S2** Results of REVIGO analysis of GO terms associated with sequences in

594 orthogroups predicted to be gained or lost along branches of interest.

595 **Table S3** Orthogroups predicted to have been gained and lost along branches of

596 evolutionary interest that were the focus of this study, estimated using the Dollo

597 parsimony principle, and the number of these orthogroups assigned GO terms by

598 REVIGO, and containing a *C. reinhardtii* sequence associated with a ChlamyNET cluster.

599

600

601

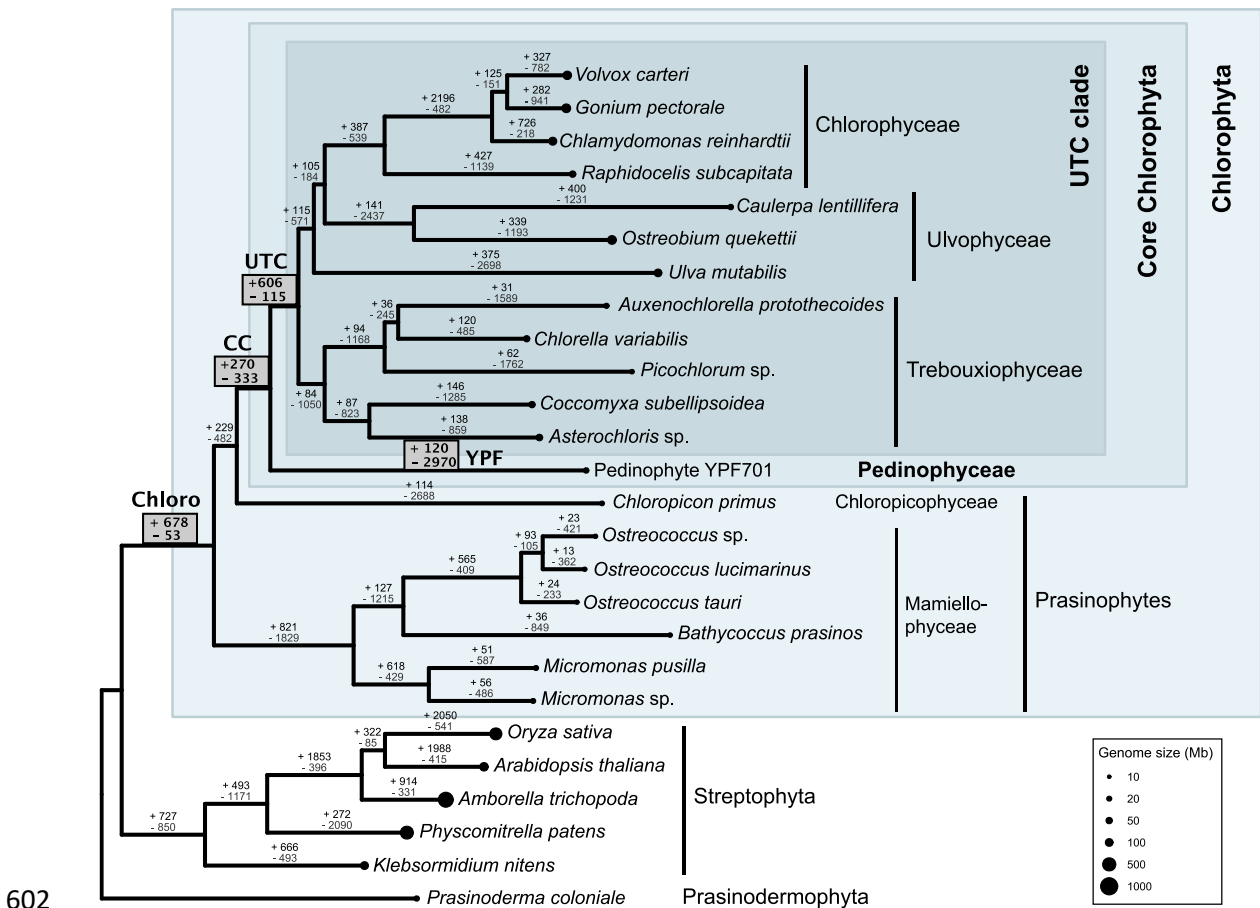

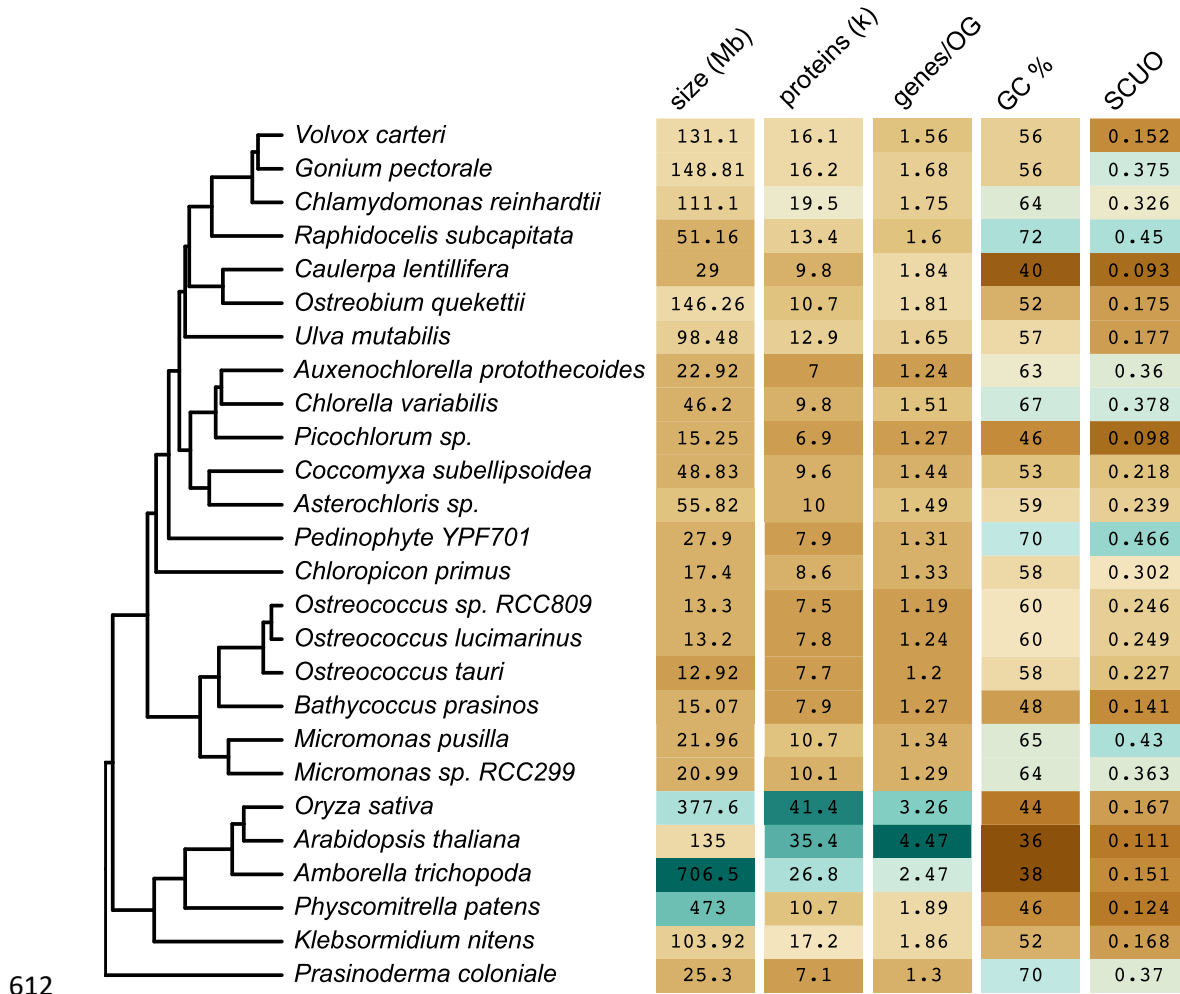

612

613 **Fig. 2** Heat map of key traits for Viridiplantae nuclear genomes used for analysis in this  
 614 study (brown= lowest value, blue=highest value). SCUO = synonymous codon usage  
 615 order.

616

617

618



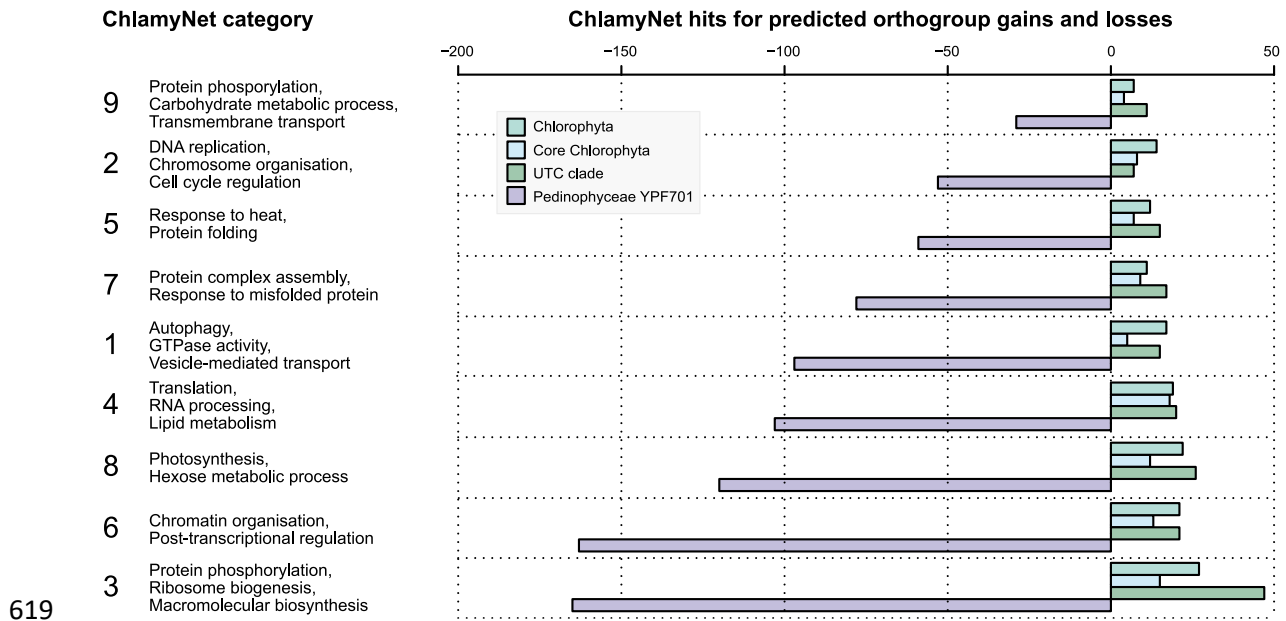

619 **Fig. 3** Number of orthogroups, containing *Chlamydomonas* sequences, gained along  
 620 the branches leading to the Chlorophyta (Chloro), Core Chlorophyta (CC) and UTC  
 621 clade (UTC), and lost along the branch leading to pedinophyte YPF701 (YPF),  
 622 categorised into the 9 ChlamyNET gene clusters. y-axis labels refer to Gene Ontology  
 623 (GO) term enrichment results for these clusters.  
 624

625

626
